# Supplementary material
Source: PubMed Central journal article supplement (PMC154303)
Supplement: pnas_0831190100_12.pdf [file pnas_0831190100_12.pdf]

**Fig. 6.** (a) Illustration of low- and high-entropy ensembles. Protein families typically have intermediate entropies. (b) Semi-log plot of the increase in the average entropy  $\bar{S}$  as the reciprocal of the size  $n$  of the subset of randomly selected database sequences increases for dihydrofolate reductase (orange) and transformylase (blue) families.  $\bar{S}_\infty$  was extrapolated by a least-squares fit of the data with the functional form  $y = \bar{S}_\infty kn / (1 + kn)$ . (c) Flowchart describing the procedure for determining  $T$ .
