# Supplementary material
Source: PubMed Central journal article supplement (PMC154303)

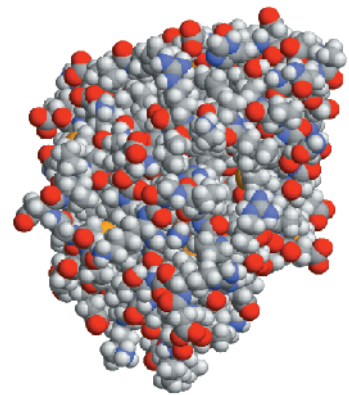

$$r = r_0 + 3 \text{ \AA}$$


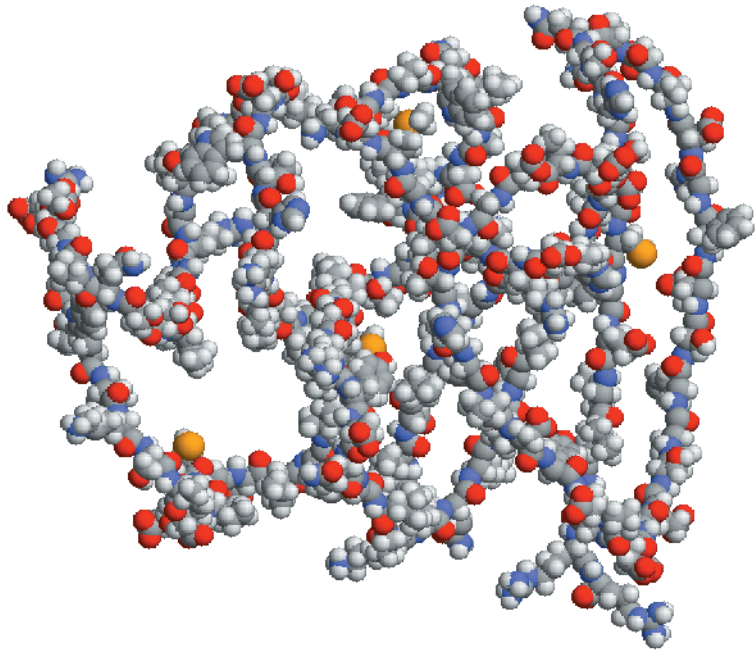

Supplement: pnas_0831190100_7.pdf [file pnas_0831190100_7.pdf]

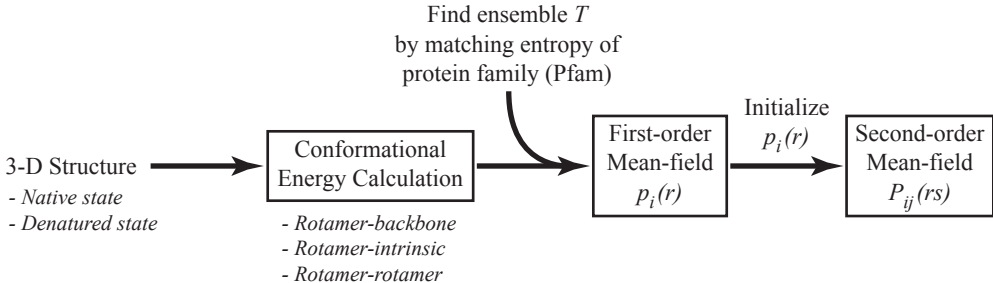

Supplement: pnas_0831190100_8.pdf [file pnas_0831190100_8.pdf]
